# Supplementary material
Source: PubMed Central journal article supplement (PMC4841683)
Supplement: NIHMS699614-supplement-01.pdf [file NIHMS699614-supplement-01.pdf]

### Supplementary Materials and Methods

**Animals:** The absence of *Helicobacter* species, including *H. bilis*, *H. ganmani*, *H. hepaticus*, *H. rodentium* and *H. typhlonius* was confirmed by PCR of fecal samples (IDEXX Laboratories, Columbia MO). Wild type (C57BL/6J), *Il10<sup>-/-</sup>*, *Tnfr2<sup>-/-</sup>* and *Rag2<sup>-/-</sup>* mice were from The Jackson Laboratory (Bar Harbor, ME).

**Chemicals, reagents and antibodies:** Dextran Sodium Sulfate (36–50 KDa) was from MP Biomedicals (Burlingame, CA). AOM was from Wako (Richmond, VA). Recombinant murine IFN and TNF were from Peprotech (Rocky Hill, NJ). Rat anti-Ki-67 was from Dako. Rabbit antibodies for Cleaved Caspase-3, pH-H3, and phospho-histone H2AX were from Cell Signaling Technology (Beverly, MA). E-cadherin, MPO and 8-hydroxyguanosine antibodies were from Abcam (Cambridge, MA). Flow cytometry antibodies for CD16/32, TNF, Biotin-TNFR2, CD3, CD4, CD8 and were from BD Biosciences (San Jose, CA).

**Colonoscopy.** Mice were anesthetized with ketamine and xylazine. Distal colonoscopy was performed using a KARL STORZ Veterinary Endoscope (Karl Storz, Tuttlingen, Germany) to track the development of disease using a previously described scoring system <sup>1</sup>.

**Barrier Function Assay:** Colonic *in vivo* permeability was measured using a previously described method <sup>2</sup>. Briefly, mice were anesthetized with ketamine and xylazine, and plasma fluorescence was measured at 30 min following intrarectal administration of 4 kDa FITC-dextran (Sigma-Aldrich, St Louis, MO); baseline plasma fluorescence was used as the blank.

**Tissue harvesting and histology:** Mice were euthanized as per institutional guidelines, colons were dissected free from the anus to distal to the cecum, emptied of fecal contents, weighed, opened longitudinally and fixed in 10% neutral buffered formalin followed by routine paraffin

embedding. After paraffin embedding, 5µm longitudinal cross sections were cut and stained by H&E, or as noted. H&E sections were scored by a pathologist (MKW) in a blinded manner for colitis scores and tumor scores, as previously described<sup>1</sup>. Neoplastic lesions were classified as adenomas with low-grade or high-grade dysplasia, intramucosal carcinoma, or invasive carcinoma<sup>3</sup>.

**AOM/DSS tumor model:** Adult 8 week-old mice received a single injection of AOM (12.5 mg/kg, i.p.); one week later, mice were given three rounds of DSS (3% w/v in drinking water) for 7 days with two week intervals of drinking water without DSS between each round, as indicated in Fig 2. Mice were euthanized 66 days following the start of the first round of DSS. Tumor progression scores indicate normal, 0; Low-grade dysplasia 1; High-grade dysplasia 2; Intramucosal adenocarcinoma 3; Invasive adenocarcinoma 4.

**Immunohistochemistry.** Paraffin-embedded colon sections were de-paraffinized, rehydrated, and pretreated with 3% hydrogen peroxide in methanol. Heat-induced antigen retrieval was performed in citrate buffer (10mM citrate, pH 6). After blocking with 10% normal goat serum, sections were incubated with primary antibody overnight at 4°C. Rat antibodies were detected using biotinylated anti-rat secondary antibody (Vector Laboratories, Burlingame, CA), followed by streptavidin-labeled horseradish peroxidase (HRP, Life Technologies, Carlsbad, CA). Rabbit antibodies were detected using HRP-labeled anti-rabbit secondary antibody (Envision, Dako, Carpinteria, CA). DAB (Sigmafast, Sigma-Aldrich) was used to develop signal, and hematoxylin served as counterstain. TUNEL staining was performed using the peroxidase in situ cell death detection kit (ApopTag kit, EMD Millipore, Billerica, MA). Quantification of pH-H2AX and TUNEL was determined by the number of positive epithelial cells per mm in longitudinal colonic cross sections, and Ki67 was determined by counting the number of positive cells per hemicrypt (100 crypts/colon section) in *Il10<sup>-/-</sup>* and *Il10<sup>-/-</sup>Tnfr2<sup>-/-</sup>* colonic sections

**Cell based Caspase-3 activity assay:** Caspase-3 activity for was measured using a previously described method <sup>1</sup>. Briefly, cells were treated for 1 h with a fluorescent caspase-3 substrate (Li-Cor Biosciences, Lincoln, NE) and in cell caspase-3 activity was determined by measuring resultant fluorescence (Odyssey System, Li-Cor Biosciences).

**Cell based peroxidase induced DNA damage:** For cell-based peroxide-induced DNA colonic epithelial damage assay, cells were stained for phospho-histone H2AX, and the relative expression was determined by quantitative in-cell Western analysis (Odyssey System, Li-Cor Biosciences), as we have previously published <sup>1</sup>.

**Generation of cDNA from RNA:** Bio-Rad iScript kit was used to generate cDNA from isolated RNA (Bio-Rad Laboratories, Irvine, CA).

**Real-time qPCR.** Validated primer sets designed by Primer Bank (<http://pga.mgh.harvard.edu/primerbank/>) were used for real-time qPCR. Real-time qPCR was carried out with Maxima SYBR Green qPCR master mix (Thermo Scientific, Waltham, MA). Actin was the housekeeping gene used to normalize target gene expression.

**Colon Explant Culture:** Colon explant cultures were carried out according to a previously described procedure<sup>1</sup>. Culture supernatants were collected after 4 h. Cytokines were measured in colon explant culture supernatants for Th1, Th2, Th17 cytokines using ELISA array (SABiosciences, QIAGEN Inc., Valencia, CA). Protein concentration of culture supernatant was measured and used to calculate the cytokine concentration in pg/mg.

**Flow Cytometry and Intracytoplasmic Cytokine Staining.** For flow cytometry, whole colon was minced and digested with Collagenase, dispase II and DNase (Sigma-Aldrich), and then stained with the indicated antibodies, as previously described<sup>2</sup>. Intracytoplasmic cytokine staining of colonic lymphocytes used a previously described protocol<sup>2</sup>. Basal apoptosis levels were measured using Annexin V Apoptosis Detection Kit (BD Pharmingen). Samples were analyzed using a Becton Dickinson LSRII (BD Biosciences) at the Children's Hospital Los Angeles Flow Core and data were analyzed using FlowJo software (Tree Star Inc., Ashland, OR).

**RNA seq and data analysis:** Total RNA from entire colons of 8 week-old male wildtype C57Bl/6 and *Tnfr2*<sup>-/-</sup> mice (n=3 each) was isolated using the PureLink RNA kit (Ambion, Life Technologies). RNA samples were submitted to the Genomic Services Lab at the HudsonAlpha Institute for Biotechnology (Huntsville, AL) for multiplex library preparation, mRNA enrichment, and sequencing. Sequencing was performed to an average depth of 50M paired-end 50bp reads per sample (HiSeq, Illumina, San Diego, CA). Data files containing raw reads were aligned to the mouse genome using Tophat2/Bowtie2<sup>4</sup>. Alignments were assembled into transcript representations with Cufflinks, and statistical tests for differential expression were performed with Cuffdiff 2<sup>4</sup>. An adjusted P value < 0.05 (q<0.05) from the Cuffdiff 2 output was used as the cutoff for statistical significance. Human protein-protein interactions were downloaded from the Reactome Pathway Database ([www.reactome.org](http://www.reactome.org), accessed 4/2014, Fig 5C)<sup>5,6</sup>. All first-order interactions were isolated for human homologs of mouse colonic TNFR2-regulated genes. IBD GWAS risk loci were color-coded using a previously published list<sup>7</sup>; CD8<sup>+</sup> T cell-enriched TNFR2 genes were identified using transcriptomic data from the Immunological Genome Project ([www.immgen.org](http://www.immgen.org), accessed 4/2014)<sup>8</sup>. Computational analysis, including the generation of a Simple Interaction File (.sif), was performed using custom-written scripts in Python and R. Cytoscape 3.1 was used to plot the interaction networks<sup>9</sup>.

**Statistics.** All data are presented as mean  $\pm$  SEM, except where noted. Non-parametric methods (Mann-Whitney test) were used for categorical data sets (i.e. colitis scores and tumor scores). Parametric methods (Student's t test or ANOVA) were used for data sets that were non-categorical. Kaplan-Meier survival curves were compared using the log-rank test. Statistical analyses were performed using GraphPad Prism (GraphPad Software Inc., La Jolla, CA), except where noted above for RNAseq analyses.

#### **Supplementary Materials and Methods References:**

1. Dube PE, Yan F, Punit S, et al. Epidermal growth factor receptor inhibits colitis-associated cancer in mice. *J Clin Invest* 2012;122:2780-92.
2. Garrett WS, Lord GM, Punit S, et al. Communicable ulcerative colitis induced by T-bet deficiency in the innate immune system. *Cell* 2007;131:33-45.
3. Boivin GP, Washington K, Yang K, et al. Pathology of mouse models of intestinal cancer: consensus report and recommendations. *Gastroenterology* 2003;124:762-77.
4. Kim D, Pertea G, Trapnell C, et al. TopHat2: accurate alignment of transcriptomes in the presence of insertions, deletions and gene fusions. *Genome Biol* 2013;14:R36.
5. Croft D, O'Kelly G, Wu G, et al. Reactome: a database of reactions, pathways and biological processes. *Nucleic Acids Res* 2011;39:D691-7.
6. Milacic M, Haw R, Rothfels K, et al. Annotating cancer variants and anti-cancer therapeutics in reactome. *Cancers (Basel)* 2012;4:1180-211.
7. Jostins L, Ripke S, Weersma RK, et al. Host-microbe interactions have shaped the genetic architecture of inflammatory bowel disease. *Nature* 2012;491:119-24.
8. Heng TS, Painter MW, Immunological Genome Project C. The Immunological Genome Project: networks of gene expression in immune cells. *Nat Immunol* 2008;9:1091-4.

9. Cline MS, Smoot M, Cerami E, et al. Integration of biological networks and gene expression data using Cytoscape. *Nat Protoc* 2007;2:2366-82.

ACCEPTED MANUSCRIPT

| gene            | locus                     | WT        | TNFR2-/- | (fold_change) | Adj P       |
|-----------------|---------------------------|-----------|----------|---------------|-------------|
| -               | chr6:69900419-69900996    | 5.33769   | 0.862105 | -2.63028      | 0.0455429   |
| -               | chr6:68807182-68807725    | 3.89312   | 0.350133 | -3.47495      | 0.0310573   |
| -               | chr3:137561868-137563224  | 0.62258   | 0.01928  | -5.01306      | 0.0310573   |
| -               | chr16:88923896-88924263   | 11.4593   | 1.71299  | -2.74193      | 0.0255982   |
| -               | chr1:80227749-80229510    | 0.498294  | 0.063094 | -2.98141      | 0.0250892   |
| -               | chr12:115833948-115834439 | 5.59516   | 0.941933 | -2.57048      | 0.0199398   |
| -               | chr4:128917306-128926558  | 4.14496   | 7.7973   | 0.911617      | 0.00718532  |
| -               | chr11:99649297-99650219   | 1.78096   | 0.131583 | -3.75861      | 0.00431857  |
| -               | chr15:81228150-81230579   | 1.85623   | 0.174539 | -3.41076      | 0.00413511  |
| -               | chr16:89084028-89084507   | 3.54076   | 0.174344 | -4.34405      | 0.00398276  |
| -               | chr6:69544356-69544963    | 4.36455   | 18.757   | 2.10353       | 0.00135292  |
| -               | chr16:89063406-89063907   | 12.138    | 0.659544 | -4.20192      | 1.27E-06    |
| N21Rik,Krt81,Kr | chr15:101431013-101491512 | 22.938    | 3.59712  | -2.67283      | 7.77E-08    |
| A530098C11Rik   | chr1:44009300-44020006    | 11.3308   | 3.02544  | -1.90503      | 0.00709903  |
| Acta1           | chr8:123891766-123894736  | 1026.66   | 273.982  | -1.9058       | 5.43E-06    |
| Actc1           | chr2:114047288-114052811  | 20.2002   | 4.1997   | -2.26601      | 2.69E-08    |
| Actn2           | chr13:12269426-12340732   | 19.4028   | 8.23535  | -1.23636      | 1.41E-05    |
| Actn3           | chr19:4861222-4877884     | 69.7975   | 6.15332  | -3.50374      | 0           |
| Adh1            | chr3:138277302-138291345  | 660.596   | 1323.79  | 1.00284       | 0.00809442  |
| Adipoq          | chr16:23146535-23157968   | 3.62821   | 1.01269  | -1.84106      | 0.0237237   |
| Adssl1          | chr12:112620046-112641355 | 25.2798   | 8.43315  | -1.58384      | 5.35E-07    |
| Ak1             | chr2:32621757-32635698    | 50.7709   | 18.4997  | -1.4565       | 9.56E-07    |
| Ankrd23,Ankrd3  | chr1:36530190-36547205    | 22.9532   | 6.55167  | -1.80876      | 1.29E-05    |
| Ano5            | chr7:51511028-51598709    | 1.18909   | 0.380072 | -1.64552      | 0.00820937  |
| Arg1            | chr10:24915206-24927470   | 19.3359   | 8.15126  | -1.24619      | 0.00109602  |
| Art1            | chr7:102101741-102111152  | 9.51142   | 2.10557  | -2.17545      | 0.0358011   |
| Asb10           | chr5:24532696-24540448    | 2.01921   | 0.439219 | -2.20078      | 0.00515146  |
| Atp1a2          | chr1:172271708-172298064  | 17.393    | 9.64203  | -0.851097     | 0.00212063  |
| Atp2a1          | chr7:126428434-126463073  | 183.156   | 43.311   | -2.08026      | 1.83E-10    |
| Btaf1           | chr19:36925840-37014061   | 11.8062   | 5.08255  | -1.21592      | 0.000169109 |
| C3              | chr17:57203972-57228136   | 20.2503   | 12.9262  | -0.647643     | 0.0412956   |
| Cacna1s         | chr1:136052800-136119822  | 4.30512   | 1.15733  | -1.89526      | 2.82E-06    |
| Cacng1          | chr11:107703217-107716476 | 21.8562   | 7.14067  | -1.61391      | 6.04E-05    |
| Calml3          | chr13:3802892-3804318     | 25.9538   | 14.5552  | -0.834405     | 0.04726     |
| Camk2b          | chr11:5969663-6065748     | 28.793    | 80.8781  | 1.49003       | 3.75E-10    |
| Car3            | chr3:14863537-14872373    | 465.31    | 129.17   | -1.84893      | 4.25E-09    |
| Casq1           | chr1:172209893-172219895  | 56.7585   | 15.5167  | -1.87102      | 1.15E-12    |
| Ccdc109b        | chr3:129914942-129970206  | 3.46658   | 1.01328  | -1.77448      | 0.0362877   |
| Cdsn            | chr17:35543105-35557180   | 12.2021   | 5.90835  | -1.0463       | 0.0336613   |
| Chac1           | chr2:119351241-119354327  | 2.97964   | 0.731071 | -2.02705      | 0.0106098   |
| Ckm             | chr7:19410932-19422841    | 721.781   | 192.333  | -1.90795      | 3.50E-07    |
| Ckmt2           | chr13:91853382-91876894   | 15.3666   | 5.08057  | -1.59673      | 0.000311989 |
| Cmya5           | chr13:93040713-93144724   | 5.41929   | 1.97289  | -1.45779      | 6.58E-07    |
| Cnfn            | chr7:25367615-25369724    | 77.3107   | 33.1397  | -1.22211      | 0.00887198  |
| Col9a1          | chr1:24177609-24252738    | 0.0258778 | 0.22691  | 3.13233       | 0.0171697   |
| Cox6a2          | chr7:128173945-128206366  | 39.26     | 12.5762  | -1.64236      | 0.000233727 |
| Cox8b           | chr7:140898941-140900446  | 98.4386   | 40.2187  | -1.29136      | 0.00849591  |
| Crct1           | chr3:93014204-93015686    | 58.2449   | 23.1631  | -1.3303       | 0.000163268 |
| Cst6            | chr19:5344704-5349574     | 35.2405   | 13.9259  | -1.33946      | 1.17E-07    |
| Ctgf            | chr10:24595441-24598682   | 37.2639   | 22.9451  | -0.69959      | 0.0239166   |
| Cyp2d12         | chr15:82555046-82559756   | 12.4793   | 26.619   | 1.09292       | 0.00200931  |
| Ddit4l          | chr3:137623671-137628332  | 5.81605   | 1.70009  | -1.77443      | 0.000227166 |
| Duox2           | chr2:122279242-122298791  | 4.56678   | 8.0337   | 0.814888      | 0.0108848   |
| Dupd1           | chr14:21676571-21714576   | 1.6588    | 0.118556 | -3.8065       | 0.000305999 |
| Eef1a2          | chr2:181146211-181157026  | 36.669    | 11.8558  | -1.62897      | 5.13E-09    |

| gene    | locus                     | WT       | TNFR2-/- | (fold_change) | Adj P       |
|---------|---------------------------|----------|----------|---------------|-------------|
| Efna3   | chr3:89302835-89322879    | 0.942056 | 3.36966  | 1.83872       | 0.00920654  |
| Elovl4  | chr9:83778691-83806305    | 27.4063  | 12.3533  | -1.14961      | 0.000186097 |
| Fabp4   | chr3:10204342-10208576    | 128.586  | 69.0142  | -0.897771     | 0.00146387  |
| Fabp5   | chr3:10012605-10016610    | 142.478  | 83.1034  | -0.77776      | 0.0150444   |
| Fgl2    | chr5:21292960-21424677    | 35.8345  | 21.121   | -0.762673     | 0.00602927  |
| Fhl3    | chr4:124700533-124708628  | 17.3701  | 8.53101  | -1.02582      | 0.038402    |
| Fitm1   | chr14:55575673-55576952   | 11.7072  | 2.71814  | -2.1067       | 0.00115478  |
| Fos     | chr12:85473900-85477270   | 35.6187  | 59.0477  | 0.729245      | 0.0107985   |
| Fsd2    | chr7:81534353-81566981    | 2.51508  | 0.512612 | -2.29466      | 0.000347941 |
| Gabrr2  | chr4:33063111-33095865    | 1.33511  | 0.12866  | -3.37532      | 0.00089139  |
| Gadl1   | chr9:115909454-116076176  | 0.576077 | 0.114222 | -2.33442      | 0.0120494   |
| Gbp1    | chr3:142594846-142619176  | 0.281631 | 10.6871  | 5.24592       | 0           |
| Gm10229 | chr16:89015276-89015846   | 68.2913  | 4.77851  | -3.83707      | 1.26E-11    |
| Gm11559 | chr11:99864475-99865571   | 2.91148  | 0.483039 | -2.59154      | 0.0118839   |
| Gm11562 | chr11:99619597-99620404   | 12.3767  | 1.0899   | -3.50537      | 2.34E-06    |
| Gm11563 | chr11:99657941-99658959   | 5.00477  | 0.474914 | -3.39756      | 0.000219417 |
| Gm11567 | chr11:99879186-99880229   | 3.65561  | 0.242567 | -3.91366      | 5.96E-05    |
| Gm11568 | chr11:99857916-99859060   | 1.61685  | 0.262336 | -2.6237       | 0.0329983   |
| Gm11570 | chr11:99984702-99986593   | 0.502986 | 0.029653 | -4.08426      | 0.00849588  |
| Gm11595 | chr11:99771713-99772913   | 1.81241  | 0.166468 | -3.44459      | 0.00348309  |
| Gm11937 | chr11:99609793-99610189   | 19.0506  | 1.48169  | -3.68452      | 4.91E-05    |
| Gm11938 | chr11:99602645-99603308   | 19.5271  | 1.57113  | -3.6356       | 3.46E-07    |
| Gm13177 | chr4:144613659-144623602  | 22.7452  | 2.84583  | -2.99864      | 5.59E-05    |
| Gm14446 | chr19:34592887-34601968   | 70.744   | 42.7764  | -0.725792     | 0.0177925   |
| Gm17821 | chr12:67656741-67669271   | 4.08606  | 7.76544  | 0.926356      | 0.000137196 |
| Gm5105  | chr3:138048760-138081498  | 5.53513  | 1.11309  | -2.31405      | 1.50E-06    |
| Gna14   | chr19:16435666-16610950   | 11.9394  | 20.736   | 0.796406      | 0.0266774   |
| Gpd1    | chr15:99717592-99725007   | 19.1847  | 9.39952  | -1.02929      | 0.000292091 |
| H19     | chr7:142575528-142578146  | 41.4779  | 11.486   | -1.85246      | 1.15E-12    |
| Hao2    | chr3:98871466-98893273    | 48.3753  | 86.1739  | 0.832981      | 0.00206188  |
| Hfe2    | chr3:96525165-96529216    | 12.1968  | 3.26424  | -1.90168      | 4.16E-05    |
| Hrc     | chr7:45335268-45338972    | 9.39644  | 3.69219  | -1.34764      | 0.000784797 |
| Jph1    | chr1:16994939-17097889    | 3.59512  | 1.39576  | -1.36499      | 0.043939    |
| Jsrp1   | chr10:80808495-80813498   | 16.6339  | 5.65807  | -1.55574      | 0.0207347   |
| Kbtbd10 | chr2:69670119-69684239    | 23.2539  | 7.69194  | -1.59606      | 3.95E-08    |
| Klhl31  | chr9:77636731-77660122    | 2.68014  | 0.704296 | -1.92805      | 5.40E-05    |
| Klk10   | chr7:43781053-43785410    | 24.2807  | 9.03705  | -1.42589      | 6.31E-05    |
| Krt13   | chr11:100117595-100121495 | 128.28   | 59.2919  | -1.11339      | 2.77E-05    |
| Krt14   | chr11:100203161-100207510 | 93.0381  | 45.8393  | -1.02124      | 0.000182937 |
| Krt15   | chr11:100131758-100135949 | 25.1099  | 12.9003  | -0.960851     | 0.00500319  |
| Krt17   | chr11:100256216-100260989 | 38.1574  | 17.2303  | -1.14702      | 0.000101523 |
| Krt25   | chr11:99315843-99322941   | 10.7499  | 1.68773  | -2.67117      | 3.57E-07    |
| Krt26   | chr11:99328483-99337965   | 0.396487 | 0.020879 | -4.24718      | 0.00431857  |
| Krt27   | chr11:99345565-99351094   | 8.12312  | 0.965082 | -3.07331      | 1.92E-06    |
| Krt31   | chr11:100046645-100050551 | 4.75308  | 0.709119 | -2.74476      | 0.000265438 |
| Krt33a  | chr11:100011198-100016212 | 6.9101   | 0.823918 | -3.06813      | 6.08E-06    |
| Krt33b  | chr11:100023633-100029868 | 9.25366  | 0.959201 | -3.27012      | 6.14E-07    |
| Krt34   | chr11:100037350-100041554 | 10.7382  | 1.18957  | -3.17424      | 9.73E-08    |
| Krt35   | chr11:100092191-100096224 | 0.993515 | 0.192689 | -2.36627      | 0.0345519   |
| Krt39   | chr11:99514623-99521258   | 0.560247 | 0.040181 | -3.80149      | 0.0212277   |
| Krt5    | chr15:101707069-101715501 | 59.2609  | 33.2914  | -0.831932     | 0.0171697   |
| Krt6a   | chr15:101689911-101694390 | 34.5912  | 15.5146  | -1.15678      | 4.64E-05    |
| Krt6b   | chr15:101676022-101680289 | 15.4897  | 7.98799  | -0.955403     | 0.0120494   |
| Krt71   | chr15:101733948-101743097 | 14.4172  | 1.58227  | -3.18773      | 5.55E-12    |
| Krt86   | chr15:101431013-101491512 | 10.4141  | 1.19505  | -3.1234       | 1.29E-05    |



| gene        | locus                     | WT       | TNFR2-/- | (fold_change) | Adj P       |
|-------------|---------------------------|----------|----------|---------------|-------------|
| Krtap1-3    | chr11:99590460-99591339   | 4.05164  | 0.473569 | -3.09686      | 0.00089139  |
| Krtap1-4    | chr11:99582548-99583677   | 3.37664  | 0.369144 | -3.19333      | 0.00135292  |
| Krtap1-5    | chr11:99579976-99581016   | 21.9583  | 1.93945  | -3.50105      | 1.40E-09    |
| Krtap11-1   | chr16:89570175-89571183   | 5.25532  | 0.649658 | -3.01602      | 0.00200338  |
| Krtap13-1   | chr16:88728861-88729611   | 9.30868  | 0.666353 | -3.80422      | 2.44E-06    |
| Krtap14     | chr16:88825290-88826145   | 18.8462  | 1.64959  | -3.5141       | 6.33E-07    |
| Krtap15     | chr16:88829008-88829844   | 30.6764  | 2.83718  | -3.4346       | 1.49E-09    |
| Krtap16-1   | chr16:88873664-88874269   | 25.7315  | 1.86191  | -3.78868      | 5.35E-07    |
| Krtap16-10b | chr16:88931803-88932264   | 34.4121  | 2.77599  | -3.63184      | 4.03E-06    |
| Krtap16-2   | chr16:88868917-88869410   | 10.1058  | 1.28761  | -2.97241      | 0.00261628  |
| Krtap16-3   | chr16:88962197-88981822   | 55.6081  | 3.75644  | -3.88786      | 1.48E-06    |
| Krtap16-4   | chr16:88884785-88885089   | 31.1103  | 2.46176  | -3.65963      | 0.000448136 |
| Krtap16-5   | chr16:88877512-88878038   | 31.8244  | 2.9375   | -3.43747      | 7.76E-07    |
| Krtap16-7   | chr16:89403026-89403774   | 16.4001  | 1.98106  | -3.04936      | 3.01E-06    |
| Krtap16-8   | chr16:89040926-89047899   | 19.1432  | 1.47129  | -3.70168      | 0.0319524   |
| Krtap16-8   | chr16:89040926-89047899   | 21.4573  | 2.13572  | -3.32867      | 3.31E-05    |
| Krtap2-4    | chr11:99614016-99614846   | 17.8348  | 1.60981  | -3.46973      | 1.99E-07    |
| Krtap22-2   | chr16:89010379-89010759   | 61.4747  | 5.55908  | -3.46707      | 7.14E-07    |
| Krtap3-1    | chr11:99566026-99566630   | 43.7644  | 4.71037  | -3.21585      | 1.14E-09    |
| Krtap3-2    | chr11:99555822-99556853   | 11.2799  | 1.24545  | -3.17902      | 3.23E-06    |
| Krtap3-3    | chr11:99550131-99550863   | 20.4513  | 2.07503  | -3.30099      | 2.57E-07    |
| Krtap4-1    | chr11:99627228-99628239   | 9.67631  | 0.900547 | -3.42558      | 2.40E-06    |
| Krtap4-16   | chr11:99850654-99851605   | 2.96777  | 0.713751 | -2.05589      | 0.0348264   |
| Krtap4-2    | chr11:99634113-99635084   | 5.09036  | 0.42189  | -3.59283      | 1.29E-05    |
| Krtap4-6    | chr11:99665042-99665960   | 7.85043  | 0.676577 | -3.53645      | 2.38E-05    |
| Krtap4-7    | chr11:99643111-99644089   | 6.93128  | 0.548229 | -3.66027      | 5.33E-06    |
| Krtap5-1    | chr7:142296376-142297069  | 1.97541  | 0.075278 | -4.71378      | 0.00921907  |
| Krtap5-5    | chr7:142228794-142229971  | 1.40354  | 0.072081 | -4.2833       | 0.00513224  |
| Krtap6-1    | chr16:89031698-89032292   | 23.9881  | 2.18791  | -3.45469      | 2.71E-06    |
| Krtap6-2    | chr16:89419322-89420111   | 15.3314  | 1.89842  | -3.01361      | 2.56E-06    |
| Krtap7-1    | chr16:89507702-89508323   | 61.6646  | 6.02257  | -3.35599      | 1.28E-11    |
| Krtap8-1    | chr16:89487373-89487952   | 62.707   | 5.37746  | -3.54363      | 4.11E-11    |
| Krtap8-2    | chr16:88895967-88896449   | 25.0741  | 2.96015  | -3.08246      | 0.000149928 |
| Krtap9-1    | chr11:99873388-99874000   | 2.93878  | 0.218168 | -3.75171      | 0.0019124   |
| Krtap9-3    | chr11:99597347-99598106   | 20.8753  | 1.90765  | -3.45193      | 4.03E-07    |
| Ky          | chr9:102506137-102546239  | 4.12539  | 1.11047  | -1.89336      | 6.08E-06    |
| Lbx1        | chr19:45232713-45235808   | 1.34027  | 0.256194 | -2.38722      | 0.00783287  |
| Ldb3        | chr14:34526634-34588695   | 42.9426  | 17.4104  | -1.30246      | 0.000251198 |
| Lrrc15      | chr16:30269301-30283254   | 1.16855  | 0.342837 | -1.76912      | 0.0146999   |
| Lrrc30      | chr17:67630964-67632723   | 0.969811 | 0.13755  | -2.81774      | 0.00892244  |
| Ltf         | chr9:111019291-111042766  | 5.60136  | 1.87672  | -1.57756      | 0.00146387  |
| Ly6d        | chr15:74762055-74763567   | 65.1309  | 33.6943  | -0.950835     | 0.0123799   |
| Ly6g6c      | chr17:35062545-35070048   | 32.3802  | 15.6088  | -1.05275      | 0.012171    |
| Mal         | chr2:127633225-127656695  | 12.1092  | 6.53365  | -0.890139     | 0.0177535   |
| Mb          | chr15:77015486-77057108   | 320.667  | 92.7827  | -1.78915      | 1.01E-07    |
| Mef2c       | chr13:83504033-83667079   | 9.30064  | 4.70928  | -0.981824     | 0.00405399  |
| Miip        | chr4:147860746-147868719  | 8.95524  | 3.49203  | -1.35866      | 0.0238179   |
| Mlf1        | chr3:67374096-67400000    | 18.3635  | 4.40731  | -2.05887      | 5.67E-06    |
| Mstn        | chr1:53061662-53068079    | 2.72847  | 0.890945 | -1.61468      | 0.0470183   |
| Mybpc1      | chr10:88518278-88605179   | 34.4867  | 13.1925  | -1.38632      | 0.000373    |
| Mybpc2      | chr7:44501698-44524669    | 48.8537  | 5.95129  | -3.03719      | 0           |
| Myf6        | chr10:107492859-107494729 | 6.03631  | 1.54239  | -1.9685       | 0.00508676  |
| Myh1        | chr11:67200093-67225805   | 147.604  | 44.616   | -1.72609      | 5.48E-05    |
| Myh2        | chr11:67171026-67197517   | 7.64859  | 3.44067  | -1.15251      | 0.000185448 |
| Myh4        | chr11:67238028-67260446   | 8.25773  | 0.620914 | -3.73328      | 0           |

| gene      | locus                     | WT       | TNFR2-/- | (fold_change) | log2 | Adj P       |
|-----------|---------------------------|----------|----------|---------------|------|-------------|
| Myh8      | chr11:67277123-67308633   | 115.281  | 46.6084  | -1.30649      |      | 0.000522751 |
| Myl1      | chr1:66924293-66945460    | 418.012  | 77.9928  | -2.42213      |      | 0           |
| Myl3      | chr9:110763680-110769794  | 275.574  | 115.996  | -1.24836      |      | 2.71E-06    |
| Mylk2     | chr2:152911351-152923065  | 6.10214  | 2.4857   | -1.29567      |      | 0.00647093  |
| Mylk4     | chr13:32700826-32784031   | 6.33977  | 1.35512  | -2.22601      |      | 1.62E-06    |
| Mylpf     | chr7:127211607-127214287  | 724.247  | 163.54   | -2.14684      |      | 4.77E-13    |
| Myo18b    | chr5:112688874-112896391  | 3.22949  | 1.26267  | -1.35483      |      | 0.000225585 |
| Myod1     | chr7:46376473-46379092    | 1.03446  | 0.201878 | -2.35733      |      | 0.0339073   |
| Myom2     | chr8:15057642-15133422    | 16.2818  | 5.29587  | -1.62032      |      | 8.95E-05    |
| Myot      | chr18:44334073-44355844   | 14.9377  | 5.56074  | -1.42561      |      | 7.58E-05    |
| Myoz1     | chr14:20646937-20656615   | 63.6254  | 15.7957  | -2.01007      |      | 7.95E-12    |
| Myoz3     | chr18:60573148-60591716   | 4.40677  | 1.37367  | -1.68169      |      | 0.0019124   |
| Mypn      | chr10:63115794-63203952   | 2.92098  | 0.952372 | -1.61685      |      | 0.000843286 |
| Neb       | chr2:52136603-52338798    | 14.3612  | 4.531    | -1.66427      |      | 1.91E-06    |
| Nlrp6     | chr7:140920711-140929289  | 31.4519  | 51.9749  | 0.724667      |      | 0.0199874   |
| Nr4a1     | chr15:101254249-101274797 | 19.9203  | 7.47922  | -1.41328      |      | 3.59E-06    |
| Padi3     | chr4:140785368-140810648  | 0.490051 | 0.095555 | -2.35853      |      | 0.0455429   |
| Pdk4      | chr6:5483350-5496278      | 9.72671  | 2.83732  | -1.77742      |      | 3.01E-07    |
| Pfkm      | chr15:98038743-98132514   | 53.2471  | 22.164   | -1.26449      |      | 9.15E-07    |
| Pgam2     | chr11:5787963-5804820     | 101.923  | 30.8297  | -1.72508      |      | 4.61E-05    |
| Phkg1     | chr5:129846989-129879083  | 4.67363  | 0.910646 | -2.35958      |      | 0.00360299  |
| Pkia      | chr3:7366603-7445365      | 10.98    | 5.51814  | -0.992622     |      | 0.0291995   |
| Pla2g12a  | chr3:129878621-129895821  | 10.8404  | 5.01344  | -1.11255      |      | 0.0417252   |
| Ppbp      | chr5:90768517-90770060    | 23.9357  | 6.90384  | -1.79369      |      | 1.29E-05    |
| Ppp1r3a   | chr6:14713821-14755274    | 1.63191  | 0.500822 | -1.70419      |      | 0.00323354  |
| Ppp1r3c   | chr19:36731730-36736604   | 15.0891  | 7.3409   | -1.03948      |      | 0.00136483  |
| Prkag3    | chr1:74738921-74748955    | 2.39464  | 0.686718 | -1.80202      |      | 0.0113044   |
| Prr9      | chr3:92122203-92123947    | 6.51331  | 0.532655 | -3.61212      |      | 1.95E-07    |
| Psap1     | chr5:36017178-36398139    | 26.5408  | 13.5304  | -0.972009     |      | 0.00783287  |
| Psca      | chr15:74714838-74717065   | 45.8833  | 14.8946  | -1.62318      |      | 3.01E-06    |
| Ptp4a3    | chr15:73723144-73758766   | 21.2656  | 12.0562  | -0.818739     |      | 0.0455429   |
| Ptpr      | chr10:116018362-116274933 | 8.51919  | 15.5292  | 0.866196      |      | 0.025175    |
| Pvalb     | chr15:78191117-78206351   | 141.822  | 21.8878  | -2.69589      |      | 0           |
| Pygm      | chr19:6384428-6398459     | 107.824  | 31.2957  | -1.78464      |      | 1.58E-11    |
| Rab6b     | chr9:103112073-103185270  | 3.77634  | 1.36788  | -1.46505      |      | 0.000883689 |
| Rarres1   | chr3:67478885-67515523    | 23.2937  | 10.7593  | -1.11435      |      | 0.00307416  |
| Rpl3l     | chr17:24727828-24736149   | 17.4549  | 4.56317  | -1.93552      |      | 0.000140649 |
| Rtn2      | chr7:19282666-19296160    | 41.8777  | 18.2823  | -1.19573      |      | 0.000405712 |
| Ryr1      | chr7:29003339-29125151    | 6.52168  | 1.54312  | -2.07939      |      | 4.11E-11    |
| S100a3    | chr3:90600214-90602702    | 6.25594  | 1.33995  | -2.22304      |      | 0.00839983  |
| Saa1,Saa3 | chr7:46711997-46743053    | 696.923  | 1402.52  | 1.00895       |      | 0.000254025 |
| Saa2      | chr7:46751832-46754314    | 46.5193  | 89.9619  | 0.951486      |      | 0.00206188  |
| Scd3      | chr19:44203191-44244267   | 20.4953  | 10.0611  | -1.0265       |      | 0.000545779 |
| Scn1b     | chr7:31116523-31126945    | 20.0843  | 10.3668  | -0.954098     |      | 0.0172084   |
| Scn4a     | chr11:106317546-106349461 | 1.37366  | 0.482064 | -1.51073      |      | 0.0132089   |
| Scn4b     | chr9:45139041-45154061    | 1.52774  | 0.496177 | -1.62248      |      | 0.031792    |
| Serpina3j | chr12:104300715-104321456 | 17.5039  | 9.42055  | -0.893796     |      | 0.0255982   |
| Serpinf1  | chr11:75410028-75422623   | 34.962   | 19.7283  | -0.82552      |      | 0.0103384   |
| Sim2      | chr16:94085259-94127032   | 3.18008  | 1.00484  | -1.6621       |      | 0.00487532  |
| Slc20a1   | chr2:129198772-129211617  | 52.1808  | 87.7445  | 0.749789      |      | 0.00660277  |
| Slc25a4   | chr8:46207340-46211009    | 356.431  | 198.071  | -0.847603     |      | 0.00438501  |
| Slc37a2   | chr9:37225183-37255738    | 26.5171  | 75.0227  | 1.5004        |      | 7.00E-08    |
| Slc38a3   | chr9:107651154-107668968  | 1.25028  | 0.31098  | -2.00735      |      | 0.0417252   |
| Slc38a4   | chr15:96994822-97055956   | 1.71098  | 0.448675 | -1.93108      |      | 0.00381629  |
| Sln       | chr9:53850250-53853849    | 146.534  | 54.8915  | -1.41658      |      | 2.82E-06    |

| gene       | locus                    | WT        | TNFR2-/- | log2<br>(fold_change) | Adj P       |
|------------|--------------------------|-----------|----------|-----------------------|-------------|
| Slpi       | chr2:164354069-164356507 | 112.778   | 67.2185  | -0.746558             | 0.0162615   |
| Smtnl2     | chr11:72388923-72411771  | 11.9626   | 3.28244  | -1.86568              | 2.77E-06    |
| Smyd1      | chr6:71213939-71262281   | 6.90551   | 1.9436   | -1.82902              | 0.00179486  |
| Sprr1a     | chr3:92483880-92485972   | 169.905   | 69.7195  | -1.2851               | 2.40E-06    |
| Sprr3      | chr3:92456500-92458722   | 40.4301   | 16.1081  | -1.32765              | 5.25E-05    |
| Srl        | chr16:4476265-4541829    | 12.1762   | 4.82447  | -1.33562              | 1.41E-05    |
| St3gal4    | chr9:35046572-35175987   | 54.934    | 95.5484  | 0.798533              | 0.0310573   |
| St8sia5    | chr18:77185846-77255450  | 2.09293   | 6.05265  | 1.53204               | 0.00642593  |
| Synpo2l    | chr14:20658948-20668308  | 2.55221   | 0.793296 | -1.68582              | 0.00375708  |
| Sypl2      | chr3:108212265-108226599 | 7.21149   | 1.69685  | -2.08744              | 6.58E-07    |
| Syt8,Tnni2 | chr7:142434855-142444414 | 592.741   | 207.222  | -1.51623              | 2.34E-06    |
| Tat        | chr8:109986063-109999804 | 5.5205    | 11.7475  | 1.08948               | 0.0130277   |
| Tbx15      | chr3:99253759-99354260   | 3.74846   | 1.55151  | -1.27262              | 0.031792    |
| Tcap       | chr11:98383810-98384953  | 86.2479   | 32.7099  | -1.39876              | 6.58E-07    |
| Tchh       | chr3:93442311-93449077   | 4.96052   | 0.739328 | -2.7462               | 6.38E-08    |
| Tchhl1     | chr3:93468753-93471980   | 0.752094  | 0.061542 | -3.61128              | 0.00524689  |
| Tmem38a    | chr8:72571212-72587286   | 33.5368   | 14.4231  | -1.21737              | 0.000101787 |
| Tmem41b    | chr7:109972186-109986230 | 14.7794   | 8.76794  | -0.753274             | 0.0243661   |
| Tmod4      | chr3:95124473-95129209   | 16.0244   | 5.02884  | -1.67198              | 0.000500115 |
| Tnfrsf1b   | chr4:145212367-145246870 | 7.89982   | 1.06101  | -2.89638              | 0           |
| Tnnc2      | chr2:164777161-164779734 | 837.557   | 291.08   | -1.52477              | 5.35E-07    |
| Tnnt3      | chr7:142460847-142516017 | 677.388   | 212.902  | -1.6698               | 0.000119894 |
| Trdn       | chr10:33083335-33478046  | 3.25336   | 0.689966 | -2.23733              | 0.0123799   |
| Trdn       | chr10:33083335-33478046  | 12.6342   | 5.06271  | -1.31936              | 0.00430626  |
| Trim54     | chr5:31116611-31137626   | 9.42906   | 2.81292  | -1.74504              | 0.00122811  |
| Trim63     | chr4:134315119-134329629 | 2.91352   | 0.848967 | -1.77898              | 0.0255982   |
| Txlnb      | chr10:17796218-17845754  | 3.90334   | 1.51275  | -1.36753              | 0.0100553   |
| Ubiad1     | chr4:148434496-148444763 | 5.04125   | 9.8057   | 0.95984               | 0.0393959   |
| Ucp3       | chr7:100472990-100486432 | 1.58003   | 0.280035 | -2.49627              | 0.00145637  |
| Xirp2      | chr2:67446001-67526618   | 2.6327    | 1.01333  | -1.37743              | 0.000556385 |
| Zfp534     | chr4:147673502-147702553 | 0.0718613 | 0.640609 | 3.15616               | 0.00013417  |
| Zmynd17    | chr14:20482863-20496901  | 17.3346   | 2.89415  | -2.58244              | 3.61E-10    |

## NOTES:

\*Two transcripts mapped to the *Trdn* gene locus.

" - " indicates a previously unidentified transcript.

Supplementary Table 2. Immune cell-specific expression of TNFR2-regulated genes

| Gene          | Max_Exprs | Median_Exprs | Which_Max | Fold_Change | FClog    | Cell Type         |
|---------------|-----------|--------------|-----------|-------------|----------|-------------------|
| Car3          | 54.9659   | 35.98265     | 14        | 1.527567    | 0.611235 | Blood Endothelium |
| Ctgf          | 917.779   | 155.2055     | 14        | 5.913315    | 2.563967 | Blood Endothelium |
| Fabp4         | 1274.17   | 23.08425     | 14        | 55.19651    | 5.786505 | Blood Endothelium |
| Fabp5         | 432.336   | 83.03575     | 14        | 5.206625    | 2.380348 | Blood Endothelium |
| Klk10         | 92.5803   | 76.76105     | 14        | 1.206084    | 0.270331 | Blood Endothelium |
| Mlf1          | 17.5898   | 13.06015     | 14        | 1.34683     | 0.429568 | Blood Endothelium |
| Pdk4          | 479.213   | 29.59365     | 14        | 16.1931     | 4.017307 | Blood Endothelium |
| Rarres1       | 52.1398   | 41.3356      | 14        | 1.261378    | 0.335    | Blood Endothelium |
| Slc38a3       | 92.4815   | 49.4532      | 14        | 1.870081    | 0.903101 | Blood Endothelium |
| St3gal4       | 611.279   | 255.8965     | 14        | 2.388774    | 1.256271 | Blood Endothelium |
| A530098C11Rik | 27.9519   | 20.21175     | 10        | 1.382953    | 0.467752 | CD4 DC            |
| Cacng1        | 81.2063   | 67.21555     | 10        | 1.208148    | 0.272797 | CD4 DC            |
| Cox6a2        | 211.782   | 150.8665     | 10        | 1.403771    | 0.489307 | CD4 DC            |
| Gm11563       | 337.698   | 256.599      | 10        | 1.316053    | 0.396218 | CD4 DC            |
| Hrc           | 74.0203   | 60.61635     | 10        | 1.221128    | 0.288214 | CD4 DC            |
| Ly6g6c        | 93.8809   | 59.9765      | 10        | 1.565295    | 0.646434 | CD4 DC            |
| Myf6          | 32.5893   | 28.79415     | 10        | 1.131803    | 0.178623 | CD4 DC            |
| Mylk2         | 76.0112   | 58.3924      | 10        | 1.301731    | 0.380431 | CD4 DC            |
| Pgam2         | 119.643   | 73.7381      | 10        | 1.62254     | 0.698254 | CD4 DC            |
| Prr9          | 25.3363   | 22.24675     | 10        | 1.138876    | 0.187611 | CD4 DC            |
| S100a3        | 41.3311   | 33.1688      | 10        | 1.246084    | 0.317401 | CD4 DC            |
| Saa1          | 12.7903   | 10.1412      | 10        | 1.261222    | 0.334822 | CD4 DC            |
| Acta1         | 200.916   | 150.6235     | 4         | 1.333895    | 0.415646 | CD4 T             |
| Actc1         | 192.921   | 159.1475     | 4         | 1.212215    | 0.277646 | CD4 T             |
| Adipoq        | 21.0798   | 17.7445      | 4         | 1.187962    | 0.248489 | CD4 T             |
| Ano5          | 25.7272   | 21.8656      | 4         | 1.176606    | 0.234632 | CD4 T             |
| Camk2b        | 116.101   | 80.28135     | 4         | 1.446176    | 0.532244 | CD4 T             |
| Cmya5         | 82.3801   | 64.7319      | 4         | 1.272635    | 0.347819 | CD4 T             |
| Cst6          | 41.9017   | 35.8033      | 4         | 1.170331    | 0.226916 | CD4 T             |
| Cyp2d12       | 19.4047   | 16.32815     | 4         | 1.18842     | 0.249045 | CD4 T             |
| Gabrr2        | 128.577   | 68.84555     | 4         | 1.867615    | 0.901197 | CD4 T             |
| Krt25         | 59.051    | 40.52325     | 5         | 1.457213    | 0.543212 | CD4 T             |
| Krt26         | 24.8054   | 22.24715     | 5         | 1.114992    | 0.157034 | CD4 T             |
| Krt27         | 109.312   | 63.0236      | 4         | 1.734461    | 0.794488 | CD4 T             |
| Krt31         | 76.3496   | 63.26845     | 4         | 1.206756    | 0.271134 | CD4 T             |
| Krt39         | 45.8357   | 32.0924      | 5         | 1.428242    | 0.51424  | CD4 T             |
| Krt86         | 43.9563   | 25.4467      | 5         | 1.727387    | 0.788591 | CD4 T             |
| Lrrc15        | 71.4131   | 44.26435     | 5         | 1.613332    | 0.690044 | CD4 T             |
| Myh4          | 39.3143   | 32.36985     | 4         | 1.214535    | 0.280403 | CD4 T             |
| Mylpf         | 79.8908   | 48.3563      | 4         | 1.652128    | 0.724326 | CD4 T             |
| Ppp1r3a       | 18.3939   | 13.20605     | 5         | 1.392839    | 0.478028 | CD4 T             |
| Rab6b         | 269.584   | 138.3965     | 4         | 1.947911    | 0.961927 | CD4 T             |
| Rpl3l         | 39.7774   | 33.6215      | 4         | 1.183094    | 0.242565 | CD4 T             |
| Scd3          | 49.1698   | 33.8439      | 5         | 1.452841    | 0.538877 | CD4 T             |
| Sln           | 52.7484   | 43.14145     | 5         | 1.222685    | 0.290053 | CD4 T             |
| Casq1         | 48.3378   | 42.83065     | 11        | 1.12858     | 0.174508 | CD8 DC            |
| Krt6a         | 76.4866   | 53.12225     | 11        | 1.439822    | 0.525891 | CD8 DC            |
| Saa2          | 13.9205   | 11.9507      | 11        | 1.164827    | 0.220116 | CD8 DC            |
| Scn4b         | 57.0591   | 38.16435     | 11        | 1.495089    | 0.580231 | CD8 DC            |

Supplementary Table 2. Immune cell-specific expression of TNFR2-regulated genes

ACCEPTED MANUSCRIPT

| Gene    | Max_<br>Exprs | Median_<br>Exprs | Which_<br>Max | Fold_<br>Change | FClog    | Cell Type |
|---------|---------------|------------------|---------------|-----------------|----------|-----------|
| Smyd1   | 48.9394       | 38.6965          | 11            | 1.264698        | 0.338793 | CD8 DC    |
| Sprr1a  | 87.862        | 67.57835         | 11            | 1.30015         | 0.378678 | CD8 DC    |
| Tnnt3   | 254.265       | 161.837          | 11            | 1.571118        | 0.651791 | CD8 DC    |
| Actn2   | 120.91        | 71.00925         | 2             | 1.702736        | 0.767855 | CD8 T     |
| Ankrd23 | 178.807       | 115.42           | 1             | 1.549186        | 0.63151  | CD8 T     |
| Arg1    | 56.233        | 38.8528          | 2             | 1.447335        | 0.533398 | CD8 T     |
| Art1    | 109.642       | 73.41755         | 2             | 1.493403        | 0.578604 | CD8 T     |
| Asb10   | 92.3681       | 69.80845         | 2             | 1.323165        | 0.403993 | CD8 T     |
| Cacna1s | 66.5446       | 49.8867          | 2             | 1.333915        | 0.415666 | CD8 T     |
| Calml3  | 34.202        | 30.10705         | 2             | 1.136013        | 0.183979 | CD8 T     |
| Cdsn    | 150.982       | 93.75335         | 2             | 1.610417        | 0.687434 | CD8 T     |
| Chac1   | 165.262       | 120.4365         | 2             | 1.372192        | 0.456482 | CD8 T     |
| Ckm     | 121.306       | 74.9309          | 2             | 1.618905        | 0.695018 | CD8 T     |
| Ckmt2   | 41.6323       | 27.8768          | 2             | 1.493439        | 0.578638 | CD8 T     |
| Cnfn    | 219.882       | 141.123          | 2             | 1.558088        | 0.639776 | CD8 T     |
| Col9a1  | 109.604       | 85.7255          | 2             | 1.278546        | 0.354504 | CD8 T     |
| Cox8b   | 93.3048       | 65.34945         | 2             | 1.427782        | 0.513776 | CD8 T     |
| Ddit4l  | 86.6861       | 57.3527          | 2             | 1.511456        | 0.595939 | CD8 T     |
| Dupd1   | 192.122       | 137.35           | 2             | 1.398777        | 0.484166 | CD8 T     |
| Eef1a2  | 147.328       | 124.1055         | 2             | 1.187119        | 0.247465 | CD8 T     |
| Efna3   | 60.1566       | 40.5051          | 2             | 1.485161        | 0.570619 | CD8 T     |
| Fitm1   | 60.4819       | 48.8239          | 2             | 1.238777        | 0.308916 | CD8 T     |
| Gadl1   | 54.2578       | 42.0121          | 2             | 1.29148         | 0.369026 | CD8 T     |
| Gm10229 | 24.1568       | 18.31245         | 2             | 1.319146        | 0.399605 | CD8 T     |
| Gm11559 | 13.885        | 10.4313          | 2             | 1.33109         | 0.412608 | CD8 T     |
| Gm11567 | 22.7365       | 18.56565         | 1             | 1.224654        | 0.292374 | CD8 T     |
| Gm13177 | 40.1918       | 36.07565         | 1             | 1.114098        | 0.155876 | CD8 T     |
| Gm5105  | 97.3833       | 66.0552          | 2             | 1.474272        | 0.560002 | CD8 T     |
| Gpd1    | 79.0393       | 62.60185         | 2             | 1.262571        | 0.336365 | CD8 T     |
| H19     | 97.5551       | 80.9888          | 2             | 1.204551        | 0.268495 | CD8 T     |
| Hfe2    | 104.958       | 69.6826          | 2             | 1.50623         | 0.590942 | CD8 T     |
| Jsrp1   | 336.888       | 211.1755         | 2             | 1.595299        | 0.673827 | CD8 T     |
| Klhl31  | 78.7352       | 52.7957          | 2             | 1.491318        | 0.576588 | CD8 T     |
| Krt13   | 52.5097       | 37.7052          | 2             | 1.392638        | 0.47782  | CD8 T     |
| Krt14   | 61.7941       | 50.3034          | 2             | 1.228428        | 0.296813 | CD8 T     |
| Krt15   | 80.3277       | 61.4221          | 2             | 1.307798        | 0.38714  | CD8 T     |
| Krt17   | 56.81         | 41.79185         | 2             | 1.359356        | 0.442923 | CD8 T     |
| Krt33a  | 62.8482       | 43.8797          | 2             | 1.432284        | 0.518318 | CD8 T     |
| Krt33b  | 411.303       | 270.989          | 2             | 1.517785        | 0.601967 | CD8 T     |
| Krt34   | 80.1967       | 58.8778          | 2             | 1.362087        | 0.445819 | CD8 T     |
| Krt35   | 97.1659       | 65.07035         | 2             | 1.493244        | 0.57845  | CD8 T     |
| Krt5    | 45.2961       | 36.3504          | 2             | 1.246096        | 0.317416 | CD8 T     |
| Krt6b   | 13.573        | 10.2774          | 2             | 1.320665        | 0.401264 | CD8 T     |
| Krt71   | 74.7779       | 57.8991          | 2             | 1.291521        | 0.369071 | CD8 T     |
| Krtap14 | 44.1425       | 31.9071          | 2             | 1.38347         | 0.468291 | CD8 T     |
| Krtap15 | 14.3805       | 11.05145         | 2             | 1.301232        | 0.379878 | CD8 T     |
| Ky      | 64.6469       | 45.30215         | 2             | 1.427016        | 0.513002 | CD8 T     |
| Lbx1    | 204.383       | 127.4585         | 2             | 1.603526        | 0.681248 | CD8 T     |
| Ldb3    | 128.775       | 92.67065         | 2             | 1.389599        | 0.474668 | CD8 T     |

Supplementary Table 2. Immune cell-specific expression of TNFR2-regulated genes

| Gene    | Max_<br>Exprs | Median_<br>Exprs | Which_<br>Max | Fold_<br>Change | FClog    | Cell Type |
|---------|---------------|------------------|---------------|-----------------|----------|-----------|
| Lrrc30  | 84.6899       | 68.6722          | 2             | 1.233249        | 0.302464 | CD8 T     |
| Mal     | 102.676       | 65.43275         | 2             | 1.569184        | 0.650014 | CD8 T     |
| Mb      | 118.952       | 85.6105          | 2             | 1.389456        | 0.47452  | CD8 T     |
| Miip    | 343.326       | 249.175          | 1             | 1.377851        | 0.46242  | CD8 T     |
| Mstn    | 34.6701       | 20.79805         | 2             | 1.666988        | 0.737244 | CD8 T     |
| Mybpc1  | 70.9431       | 46.49815         | 2             | 1.525719        | 0.609489 | CD8 T     |
| Mybpc2  | 74.8514       | 47.38915         | 2             | 1.579505        | 0.659473 | CD8 T     |
| Myh1    | 35.224        | 29.73765         | 2             | 1.184492        | 0.244268 | CD8 T     |
| Myh2    | 57.0271       | 41.2945          | 2             | 1.380985        | 0.465698 | CD8 T     |
| Myh8    | 63.9911       | 50.37515         | 2             | 1.270291        | 0.345159 | CD8 T     |
| Myl1    | 23.4096       | 19.26895         | 2             | 1.214887        | 0.280822 | CD8 T     |
| Myl3    | 80.846        | 65.91505         | 2             | 1.226518        | 0.294568 | CD8 T     |
| Mylk4   | 21.6585       | 18.97405         | 2             | 1.14148         | 0.190906 | CD8 T     |
| Myo18b  | 124.756       | 83.72225         | 2             | 1.490118        | 0.575426 | CD8 T     |
| Myod1   | 105.383       | 82.1732          | 2             | 1.28245         | 0.358902 | CD8 T     |
| Myom2   | 42.2199       | 32.2744          | 2             | 1.308154        | 0.387533 | CD8 T     |
| Myot    | 41.6755       | 35.0177          | 2             | 1.190127        | 0.251115 | CD8 T     |
| Myoz3   | 181.067       | 109.958          | 2             | 1.646692        | 0.719571 | CD8 T     |
| Mypn    | 35.0759       | 22.20735         | 2             | 1.579473        | 0.659443 | CD8 T     |
| Neb     | 70.3659       | 36.10315         | 2             | 1.949024        | 0.962752 | CD8 T     |
| Nlrp6   | 93.2744       | 73.65765         | 2             | 1.266323        | 0.340646 | CD8 T     |
| Padi3   | 121.42        | 80.9755          | 2             | 1.499466        | 0.584449 | CD8 T     |
| Prkag3  | 134.77        | 93.5242          | 2             | 1.441017        | 0.527088 | CD8 T     |
| Psap1   | 114.883       | 85.66505         | 2             | 1.341072        | 0.423387 | CD8 T     |
| Psca    | 51.2223       | 39.52295         | 2             | 1.296014        | 0.374081 | CD8 T     |
| Ptprr   | 65.608        | 43.4942          | 2             | 1.508431        | 0.593049 | CD8 T     |
| Pvalb   | 54.5752       | 37.3585          | 2             | 1.460851        | 0.546809 | CD8 T     |
| Ryr1    | 82.6806       | 66.00785         | 2             | 1.252587        | 0.324911 | CD8 T     |
| Scn4a   | 77.7898       | 55.814           | 2             | 1.393733        | 0.478954 | CD8 T     |
| Sim2    | 58.3201       | 39.37015         | 2             | 1.481328        | 0.566891 | CD8 T     |
| Sprr3   | 29.9162       | 23.89235         | 1             | 1.252125        | 0.324378 | CD8 T     |
| St8sia5 | 37.3147       | 31.5128          | 2             | 1.184112        | 0.243806 | CD8 T     |
| Synpo2l | 88.1433       | 64.2715          | 2             | 1.371421        | 0.455672 | CD8 T     |
| Sypl2   | 92.0231       | 68.28925         | 2             | 1.347549        | 0.430338 | CD8 T     |
| Syt8    | 111.134       | 88.7088          | 2             | 1.252796        | 0.325151 | CD8 T     |
| Tat     | 66.4435       | 40.42155         | 2             | 1.643764        | 0.717003 | CD8 T     |
| Tbx15   | 28.0711       | 20.7949          | 2             | 1.349903        | 0.432856 | CD8 T     |
| Tcap    | 85.5632       | 66.5705          | 2             | 1.285302        | 0.362107 | CD8 T     |
| Tchh    | 91.6129       | 47.8785          | 2             | 1.913445        | 0.936173 | CD8 T     |
| Tnnc2   | 106.815       | 70.76575         | 2             | 1.509417        | 0.593991 | CD8 T     |
| Trdn    | 82.1907       | 63.4863          | 2             | 1.294621        | 0.37253  | CD8 T     |
| Trim54  | 100.34        | 58.65395         | 2             | 1.710712        | 0.774597 | CD8 T     |
| Trim63  | 90.7309       | 58.603           | 2             | 1.54823         | 0.630619 | CD8 T     |
| Ucp3    | 71.2701       | 45.97475         | 2             | 1.550201        | 0.632455 | CD8 T     |
| Xirp2   | 29.9763       | 23.22585         | 2             | 1.290644        | 0.368091 | CD8 T     |
| Zmynd17 | 121.427       | 70.84985         | 2             | 1.713864        | 0.777253 | CD8 T     |
| Ankrd39 | 208.164       | 148.144          | 1             | 1.405146        | 0.49072  | CD8 T     |
| Nr4a1   | 7411.4        | 2226.59          | 9             | 3.328588        | 1.73491  | DC        |
| Slc20a1 | 1246.87       | 589.9215         | 9             | 2.11362         | 1.079716 | DC        |

**Supplementary Table 2. Immune cell-specific expression of TNFR2-regulated genes**

| Gene     | Max_Exprs | Median_Exprs | Which_Max | Fold_Change | FClog    | Cell Type             |
|----------|-----------|--------------|-----------|-------------|----------|-----------------------|
| Tnni2    | 292.285   | 141.2025     | 9         | 2.06997     | 1.04961  | DC                    |
| Actn3    | 98.2603   | 61.39435     | 12        | 1.600478    | 0.678503 | Fibroblasts           |
| Adh1     | 2351.42   | 57.21215     | 12        | 41.10001    | 5.361067 | Fibroblasts           |
| Ak1      | 262.727   | 72.6759      | 12        | 3.61505     | 1.854016 | Fibroblasts           |
| Atp1a2   | 1243.09   | 77.07815     | 12        | 16.12766    | 4.011465 | Fibroblasts           |
| C3       | 13097.5   | 108.6502     | 12        | 120.5474    | 6.913457 | Fibroblasts           |
| Elovl4   | 56.009    | 39.4477      | 12        | 1.419829    | 0.505717 | Fibroblasts           |
| Fos      | 6448.97   | 1657.16      | 12        | 3.89158     | 1.960356 | Fibroblasts           |
| Gna14    | 89.4295   | 44.8382      | 12        | 1.994494    | 0.996022 | Fibroblasts           |
| Pfkm     | 346.188   | 156.5525     | 12        | 2.211322    | 1.144909 | Fibroblasts           |
| Phkg1    | 43.9753   | 22.64475     | 12        | 1.941964    | 0.957517 | Fibroblasts           |
| Pkia     | 121.465   | 14.2564      | 12        | 8.520033    | 3.090859 | Fibroblasts           |
| Ppp1r3c  | 161.559   | 34.31755     | 12        | 4.707766    | 2.235043 | Fibroblasts           |
| Pygm     | 518.532   | 80.7812      | 12        | 6.418969    | 2.682342 | Fibroblasts           |
| Rtn2     | 165.427   | 55.0313      | 12        | 3.006053    | 1.58787  | Fibroblasts           |
| Serpinf1 | 1586.27   | 76.7605      | 12        | 20.66519    | 4.36913  | Fibroblasts           |
| Slc25a4  | 1006.33   | 621.7925     | 12        | 1.618434    | 0.694598 | Fibroblasts           |
| Saa3     | 36.9202   | 22.4639      | 12        | 1.643535    | 0.716802 | Fibroblasts           |
| Duox2    | 97.9309   | 35.36445     | 13        | 2.769191    | 1.469464 | Lymphatic Endothelium |
| Jph1     | 59.13     | 41.82815     | 13        | 1.413641    | 0.499416 | Lymphatic Endothelium |
| Scn1b    | 520.962   | 103.6755     | 13        | 5.024929    | 2.329103 | Lymphatic Endothelium |
| Slc38a4  | 183       | 27.8189      | 13        | 6.578262    | 2.717706 | Lymphatic Endothelium |
| Smtnl2   | 164.376   | 73.06495     | 13        | 2.249724    | 1.169748 | Lymphatic Endothelium |
| Btaf1    | 865.266   | 494.341      | 8         | 1.750342    | 0.807637 | Macrophage            |
| Ccdc109b | 150.146   | 41.41965     | 8         | 3.624994    | 1.857979 | Macrophage            |
| Fgl2     | 3917.63   | 119.926      | 8         | 32.66706    | 5.029765 | Macrophage            |
| Fsd2     | 55.52     | 36.95235     | 8         | 1.502475    | 0.587341 | Macrophage            |
| Gbp1     | 2932.83   | 38.8515      | 8         | 75.48821    | 6.238179 | Macrophage            |
| Kbtbd10  | 106.7     | 59.2326      | 8         | 1.801373    | 0.849097 | Macrophage            |
| Myoz1    | 51.8313   | 39.60695     | 8         | 1.308642    | 0.38807  | Macrophage            |
| Ppbp     | 30.6144   | 16.57345     | 8         | 1.847195    | 0.885336 | Macrophage            |
| Slc37a2  | 850.939   | 92.53055     | 8         | 9.196303    | 3.201054 | Macrophage            |
| Tmem41b  | 229.87    | 135.3335     | 8         | 1.698545    | 0.764299 | Macrophage            |
| Tnfrsf1b | 1453.95   | 539.7885     | 8         | 2.693555    | 1.429512 | Macrophage            |
| Txlnb    | 70.4584   | 48.09125     | 8         | 1.465098    | 0.550997 | Macrophage            |
| Atp2a1   | 113.506   | 88.85965     | 7         | 1.277363    | 0.353168 | Mature B              |
| Crct1    | 46.8429   | 31.7126      | 7         | 1.477107    | 0.562774 | Mature B              |
| Hao2     | 25.5545   | 19.079       | 7         | 1.339405    | 0.421592 | Mature B              |
| Ly6d     | 4650.27   | 110.2315     | 7         | 42.1864     | 5.398706 | Mature B              |
| Mef2c    | 2073.18   | 272.5945     | 7         | 7.605363    | 2.927017 | Mature B              |
| Ptp4a3   | 1424.66   | 522.4705     | 7         | 2.726776    | 1.447196 | Mature B              |
| Tchhl1   | 115.644   | 87.16075     | 7         | 1.32679     | 0.40794  | Mature B              |
| Tmod4    | 50.3935   | 38.8674      | 7         | 1.296549    | 0.374677 | Mature B              |
| Ubiad1   | 64.2903   | 30.35845     | 7         | 2.117707    | 1.082503 | Mature B              |
| Adssl1   | 519.579   | 62.57405     | 6         | 8.303426    | 3.053707 | Progenitor B          |
| Fhl3     | 290.378   | 164.255      | 6         | 1.767849    | 0.821995 | Progenitor B          |
| Ltf      | 190.632   | 29.3154      | 6         | 6.502794    | 2.70106  | Progenitor B          |
| Pla2g12a | 102.187   | 82.8843      | 6         | 1.232887    | 0.302041 | Progenitor B          |
| Slpi     | 97.3631   | 70.3139      | 6         | 1.384692    | 0.469565 | Progenitor B          |

**Supplementary Table 2. Immune cell-specific expression of TNFR2-regulated genes**

| <b>Gene</b> | <b>Max_<br/>Exprs</b> | <b>Median_<br/>Exprs</b> | <b>Which_<br/>Max</b> | <b>Fold_<br/>Change</b> | <b>FClog</b> | <b>Cell Type</b> |
|-------------|-----------------------|--------------------------|-----------------------|-------------------------|--------------|------------------|
| Tmem38a     | 79.5859               | 46.5519                  | 6                     | 1.709617                | 0.773673     | Progenitor B     |
| Srl         | 96.7261               | 35.0546                  | 3                     | 2.759298                | 1.464301     | Progenitor T     |



| IBD Susceptibility Loci <sup>1</sup> | CD8 <sup>+</sup> T cell activation <sup>2,3</sup> |          |          | CD8 <sup>+</sup> T cell IBD signature <sup>4</sup> |
|--------------------------------------|---------------------------------------------------|----------|----------|----------------------------------------------------|
| ATP2A1                               | ACTN3                                             | H19      | PGAM2    | ACTN2                                              |
| CACNA1S                              | ADH1C                                             | HAO2     | PHKG1    | CCDC109B                                           |
| CDSN                                 | ADSSL1                                            | HRC      | PKIA     | H19                                                |
| CST6                                 | AK1                                               | KRT27    | PSCA     | KRT71                                              |
| EEF1A2                               | ARG1                                              | KRT33A   | PTP4A3   | MSTN                                               |
| FOS                                  | ASB10                                             | KRT35    | PYGM     | MYBPC2                                             |
| H19                                  | BTA1F1                                            | KRT5     | S100A3   | MYH8                                               |
| MYLPP                                | CA3                                               | KRT6A    | SAA1     | NEB                                                |
| MYOZ3                                | CAMK2B                                            | KRTAP8-1 | SERPINF1 | NR4A1                                              |
| PPBP                                 | CASQ1                                             | LDB3     | SLC20A1  | PDK4                                               |
| TCAP                                 | CKMT2                                             | LTF      | SLC25A4  | TCHHL1                                             |
| TNNT3                                | CNFN                                              | MAL      | SLC37A2  | TNFRSF1B                                           |
| TRIM54                               | EEF1A2                                            | MIIP     | SLC38A4  |                                                    |
|                                      | EFNA3                                             | MLF1     | SMYD1    |                                                    |
|                                      | FABP5                                             | MYH4     | ST3GAL4  |                                                    |
|                                      | FGL2                                              | MYL1     | SYNPO2L  |                                                    |
|                                      | FOS                                               | MYL3     | TBX15    |                                                    |
|                                      | FSD2                                              | MYLK4    | TNFRSF1B |                                                    |
|                                      | GABRR2                                            | MYLPP    | TNNC2    |                                                    |
|                                      | GADL1                                             | MYOZ1    | ZMYND17  |                                                    |
|                                      | GBP1                                              | NR4A1    |          |                                                    |
|                                      | GNA14                                             | PFKM     |          |                                                    |

**Supplementary Table 3. TNFR2-regulated genes involved in CD8<sup>+</sup> T cells and IBD**

1. Jostins L, Ripke S, Weersma RK, et al. Host-microbe interactions have shaped the genetic architecture of inflammatory bowel disease. *Nature* 2012;491:119-24.
2. Subramanian A, Tamayo P, Mootha VK, et al. Gene set enrichment analysis: a knowledge-based approach for interpreting genome-wide expression profiles. *Proc Natl Acad Sci U S A* 2005;102:15545-50.
3. Wang M, Windgassen D, Papoutsakis ET. Comparative analysis of transcriptional profiling of CD3<sup>+</sup>, CD4<sup>+</sup> and CD8<sup>+</sup> T cells identifies novel immune response players in T-cell activation. *BMC Genomics* 2008;9:225.
4. Lee JC, Lyons PA, McKinney EF, et al. Gene expression profiling of CD8<sup>+</sup> T cells predicts prognosis in patients with Crohn disease and ulcerative colitis. *J Clin Invest* 2011;121:4170-9.

## Supplementary figure 1

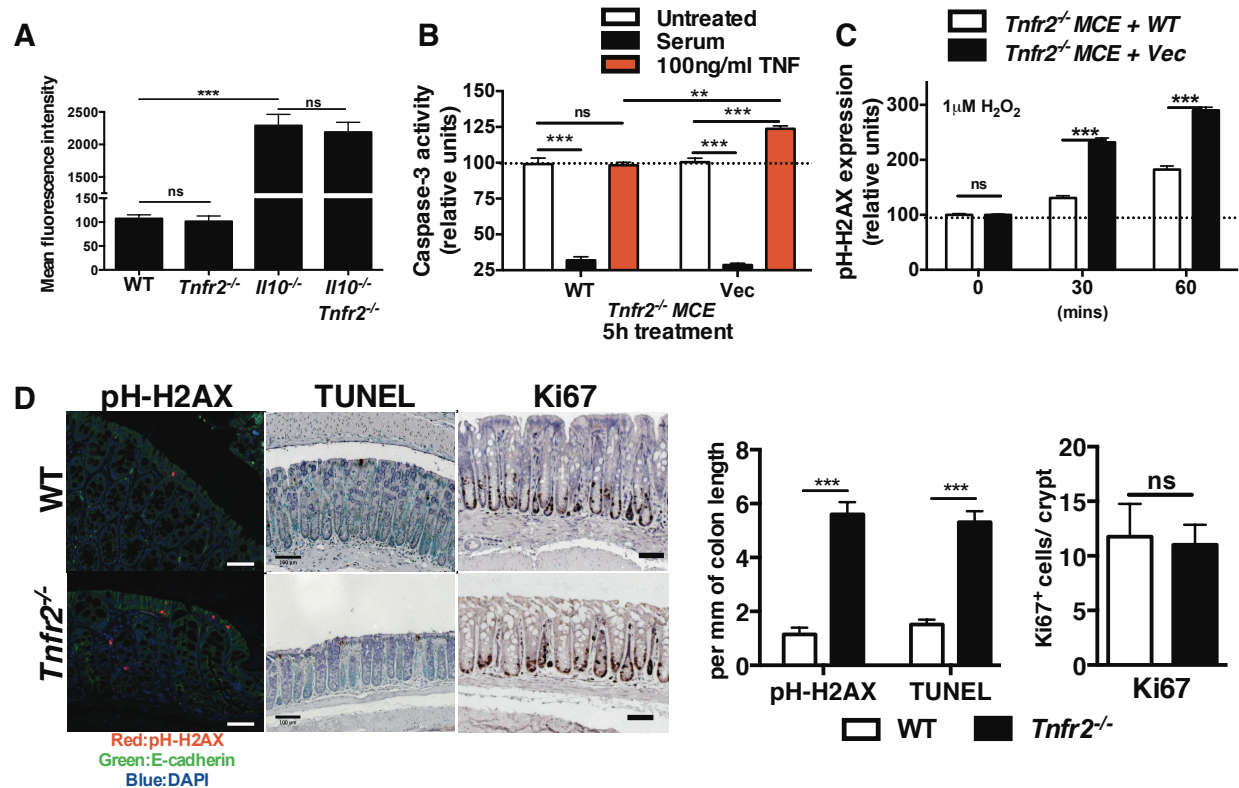

## Supplemental figure 1:

(A) Barrier function assay showing mean plasma fluorescence following intra-rectal FITC-dextran administration of 16 week-old wildtype (WT), *Tnfr2*<sup>-/-</sup>, *Il10*<sup>-/-</sup>, and *Il10*<sup>-/-</sup>*Tnfr2*<sup>-/-</sup> mice; \*\*\*P<0.001, ns not significant. (B) TNF-induced apoptosis in TNFR2<sup>-/-</sup> mouse colon epithelial cell lines stably transduced with wildtype TNFR2 (WT) add-back, or empty vector, measured by in-cell caspase-3 activity assay; \*\*\*P<0.001, ns not significant. (C) Hydrogen peroxide-induced DNA damage in *Tnfr2*<sup>-/-</sup> mouse colon epithelial cell lines stably transduced with wildtype TNFR2 (WT) add-back, or empty vector, measured by pH-H2AX expression by quantitative in-cell Western analysis; \*\*\*P<0.001, ns not significant. (D) Representative images and quantification of epithelial DNA-damage by phosphohistone-H2AX staining (red), apoptosis by TUNEL staining and proliferation by Ki67 staining in WT and *Tnfr2*<sup>-/-</sup> colonic sections, as in Figure 1; n=5; \*\*\*P < 0.001, ns not significant; scale bars: 100μm.

## Supplementary figure 2

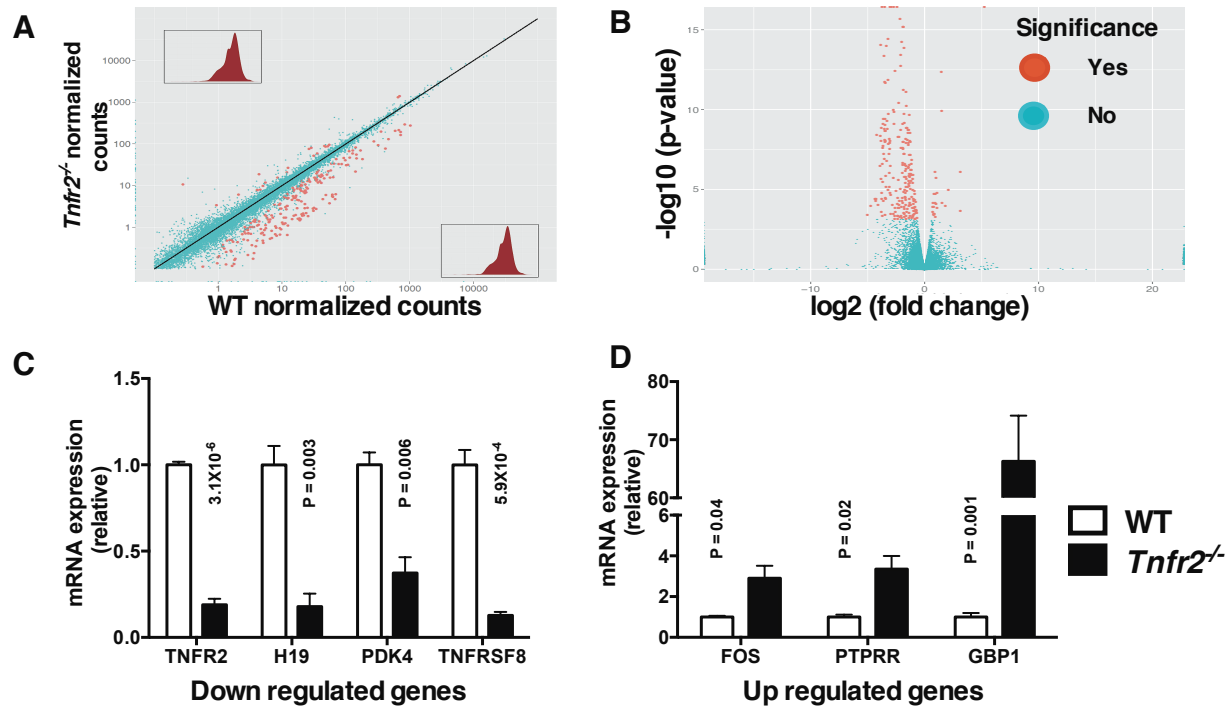

## Supplemental figure 2:

(A) Scatter plot depicting RNAseq gene expression profiles of *Tnfr2*<sup>-/-</sup> (Y-axis) and WT (X-axis) colonic mRNA. Differentially expressed genes are represented by red dots. Inset histogram represents distribution of total read counts. (B) Volcano plot depicting relationship between p-value (Y-axis) and fold change (X-axis). Differentially expressed genes are represented by red dots. (C) qPCR validation of down-regulated genes of interest. (D) qPCR validation of up-regulated genes of interest.

## Supplementary Figure 3

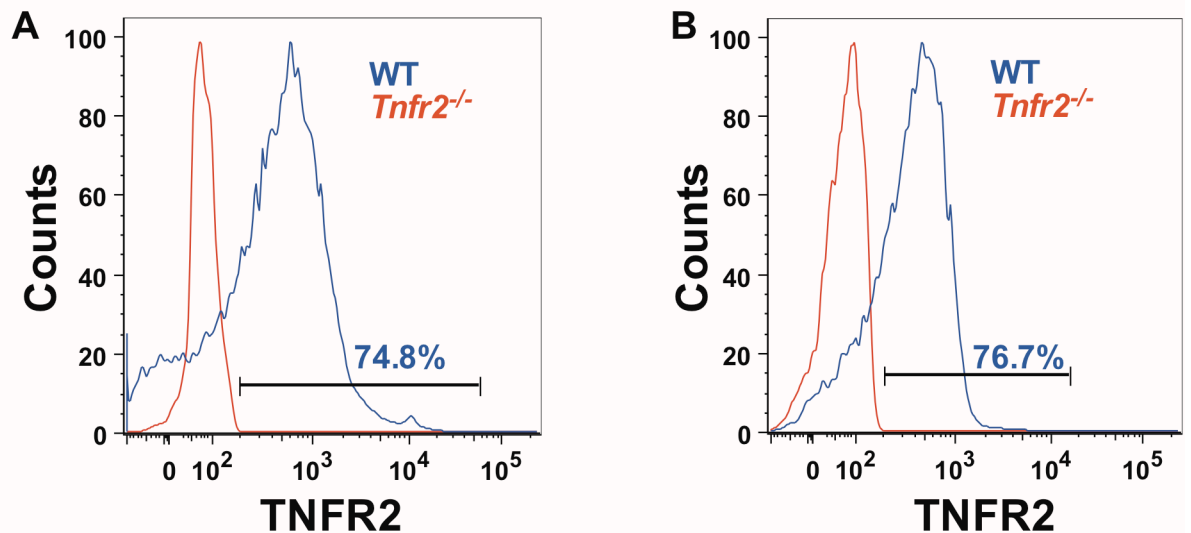**Supplemental figure 3:**

(A) Representative histogram showing TNFR2 expression in CD3<sup>+</sup>CD8<sup>+</sup> T cells (%) from mesenteric lymph nodes of 8 week-old WT mice; *Tnfr2*<sup>-/-</sup> mice were used as negative control; n=5. (B) Representative histogram showing TNFR2 expression in naïve CD8<sup>+</sup> T cells (CD44<sup>low</sup>CD62<sup>+</sup>CD8<sup>+</sup>) (%) from the peripheral lymph nodes of 8 week-old WT mice; *Tnfr2*<sup>-/-</sup> mice were used as negative control: n=5.
